# Supplementary material for: Impact of environmental gradients on juvenile coral demography across the Great Barrier Reef and Torres Strait
Source: Research Square preprint supplement (doi:10.21203/rs.3.rs-7060133/v1), 2025-08-01
Supplement: Supplementary file 1 [file 724f3c8201cb98358de99478.docx]

**SUPPLEMENTARY INFORMATION**

Impact of environmental gradients on juvenile coral demography across the Great Barrier Reef and Torres Strait

*Coral Reefs*

Christopher Doropoulos1, Mariana Alvarez-Noriega2, Katharina Fabricius2, Renata Ferrari2, Peter J Mumby3,Sam HC Noonan2, Melanie Orr1, Kinam Salee1

1 CSIRO Environment, St Lucia, QLD 4067, Australia

2 Australian Institute of Marine Sciences, Townsville, QLD 4810, Australia

3 Marine Spatial Ecology Lab, School of The Environment, The University of Queensland, St. Lucia, QLD 4072, Australia

Corresponding author: [christopher.doropoulos@csiro.au](mailto:christopher.doropoulos@csiro.au)

ORCID: CD 0000-0001-8038-2771; MAN 0000-0003-1295-6897; KF 0000-0001-7671-4358; RF 0000-0002-5056-1178; PJM 0000-0002-6297-9053; SHCN 0000-0002-0392-6197; MO 0000-0002-2635-067X; KS 0000-0002-7416-3780

**Table S1** Number of sites and fixed quadrats established in 2021 and resurveyed in 2022 and 2023 per reef. Each quadrat had ≥1 juvenile coral when established in 2021.

|  |  |  |  | **Quadrats** | | |
| --- | --- | --- | --- | --- | --- | --- |
| **Latitude** | **Reef Cluster** | **Reef** | **Sites** | **2021** | **2022** | **2023** |
| Far North | Far northern | Aukane | 5 | 27 | 28 | 26 |
| Far North | Far northern | Dungeness | 5 | 24 | 22 | 17 |
| Far North | Far northern | Masig | 6 | 25 | 32 | 33 |
| North | Northern offshore | Lizard | 5 | 19 | 18 | 18 |
| North | Northern offshore | Moore | 6 | 21 | 22 | 22 |
| Central | Central inshore | Orpheus | 1 | 7 | 6 | 4 |
| Central | Central inshore | Pelorus | 3 | 12 | 14 | 13 |
| Central | Central offshore | Chicken | 3 | 15 | 15 | 16 |
| Central | Central offshore | Davies | 7 | 35 | 37 | 39 |
| Central | Central offshore | Little Broadhurst | 3 | 16 | 16 | 16 |
| South | Southern inshore | Great Keppel | 1 | 5 | 4 | 3 |
| South | Southern inshore | North Keppel | 1 | 1 | 2 | 2 |
| South | Southern offshore | Heron | 5 | 23 | 22 | 20 |
| South | Southern offshore | Lady Musgrave | 5 | 24 | 25 | 24 |
|  |  |  |  |  |  |  |
|  |  | **Totals** | 56 | 254 | 263 | 253 |

**Table S2** List of environmental variables extracted from eReefs biogeochemical (GBR4, version 3.1). and hydrodynamic (GBR1, version 2.0) models

| **Variable code** | **Variable name** | **Units** | **eReefs model** |
| --- | --- | --- | --- |
| alk | Total alkalinity | mmol m-3 | biogeochemical |
| Chl_a_sum | Total Chlorophyll | mg Chl m-3 | biogeochemical |
| Current_speed | Current speed | m s-1 | hydrodynamic |
| DetBL_N | Labile detrital Nitrogen Benthic | mg N m-3 | biogeochemical |
| DetPL_N | Labile Detrital Nitrogen Planktonic | mg N m-3 | biogeochemical |
| DetR_N | Refractory Detrital Nitrogen | mg N m-3 | biogeochemical |
| DIC | Dissolved Inorganic Carbon | mg C m-3 | biogeochemical |
| DIN | Dissolved Inorganic Nitrogen | mg N m-3 | biogeochemical |
| DIP | Dissolved Inorganic Phosphorus | mg P m-3 | biogeochemical |
| DOR_N | Dissolved Organic Nitrogen | mg N m-3 | biogeochemical |
| DOR_P | Dissolved Organic Phosphorus | mg P m-3 | biogeochemical |
| Dust | Dust | kg m-3 | biogeochemical |
| EpiPAR_sg | Light intensity above seagrass | mol photon m-2 d-1 | biogeochemical |
| EPO | Ecology Particulate Organics | kg m-3 | biogeochemical |
| FineSed | Fine Sediment | kg m-3 | biogeochemical |
| Fluorescence | Simulated fluorescence | mg chla m-3 | biogeochemical |
| Kd_490 | Vertical attenuation at 490nm | m-1 | biogeochemical |
| mixed_layer | Mixed layer depth | m | biogeochemical |
| month_EpiPAR_sg | Monthly dose light above seagrass | mol photon m-2 | biogeochemical |
| MPB_N | Microphytobenthos N | mg N m-3 | biogeochemical |
| MPB_N_sed | Microphytobenthos N sediment | mg N m-3 | biogeochemical |
| Mud.mineral | Mud mineral | kg m-3 | biogeochemical |
| NH4 | Ammonia | mg N m-3 | biogeochemical |
| NO3 | Nitrate | mg N m-3 | biogeochemical |
| omega_ar_expose | Aragonite saturation exposure | day | biogeochemical |
| omega_ar | Aragonite saturation state | mmol m-3 | biogeochemical |
| Oxygen | Dissolved Oxygen | mg O m-3 | biogeochemical |
| PAR | Average PAR in layer | mol photon m-2 s-1 | biogeochemical |
| PAR_z | Downwelling PAR at top of layer | mol photon m-2 s-1 | biogeochemical |
| pco2surf | Oceanic pCO2 | ppmv | biogeochemical |
| PH | pH | log(mM) | biogeochemical |
| Secchi | Secchi depth | m | biogeochemical |
| TC | Total carbon | mg C m-3 | biogeochemical |
| TN | Total Nitrogen | mg N m-3 | biogeochemical |
| TP | Total phosphorus | mg P m-3 | biogeochemical |
| Turbidity | Simulated turbidity vs. bp_590 relationship | NTU | biogeochemical |
| salt | Salinity | psu | hydrodynamic |
| temp | Temperature | ˚ C | hydrodynamic |

**SUPPLEMENTARY FIGURES**


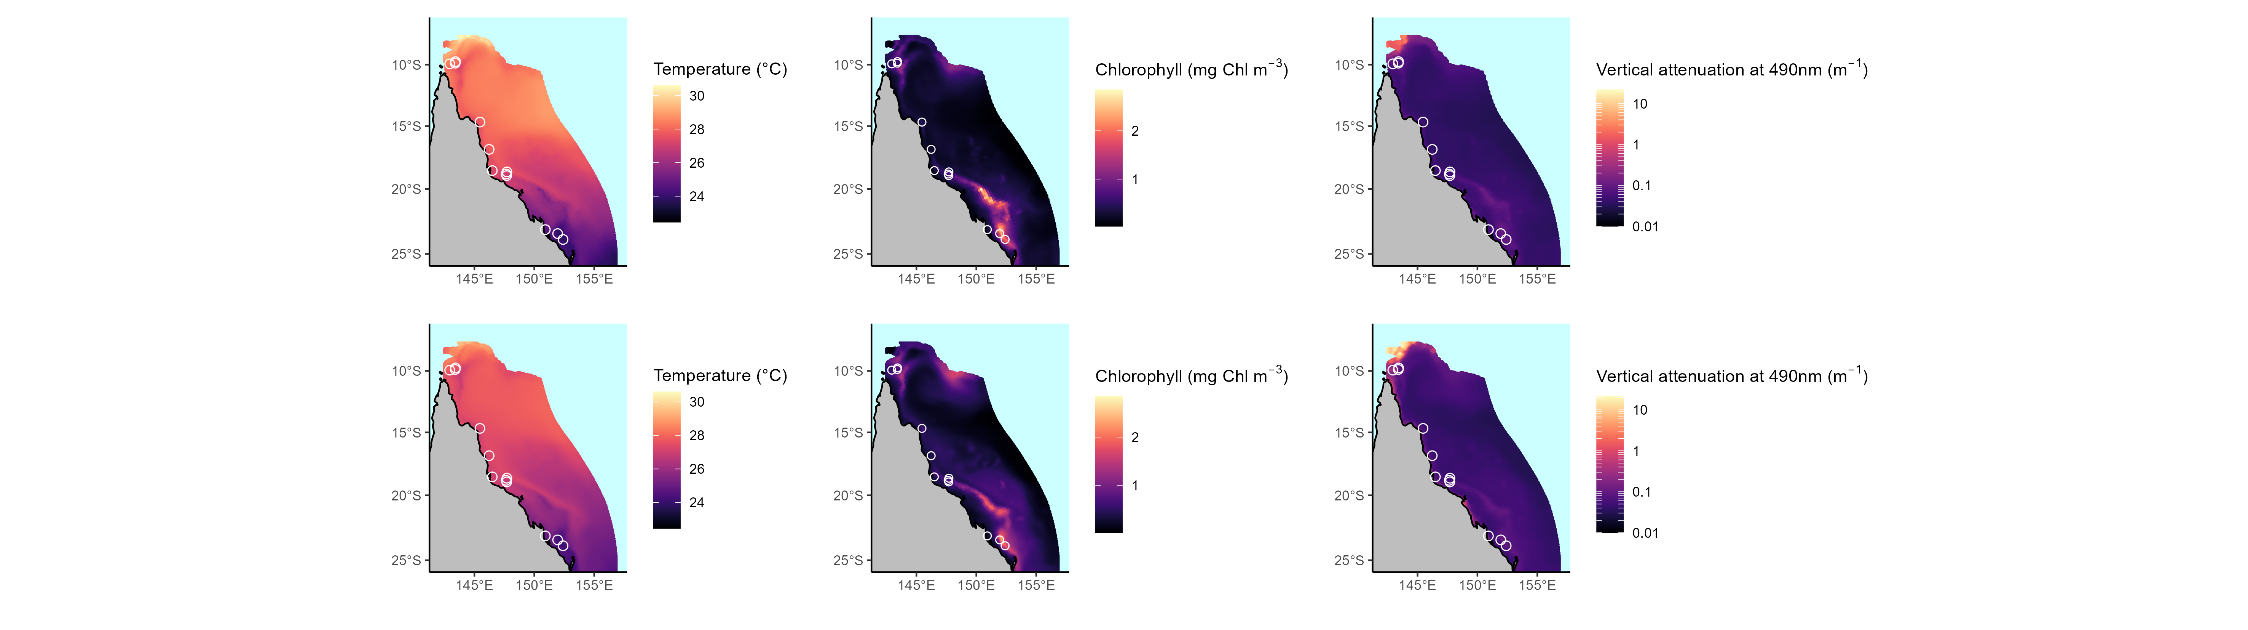


**Figure S1** Annual mean temperature (left), chlorophyll *a* (centre) and vertical attenuation (right) levels as derived from eReefs model outputs at 5 m depth in 2022 (top) and 2023 (bottom) across the study region. Open circles within each plot indicate study reefs.


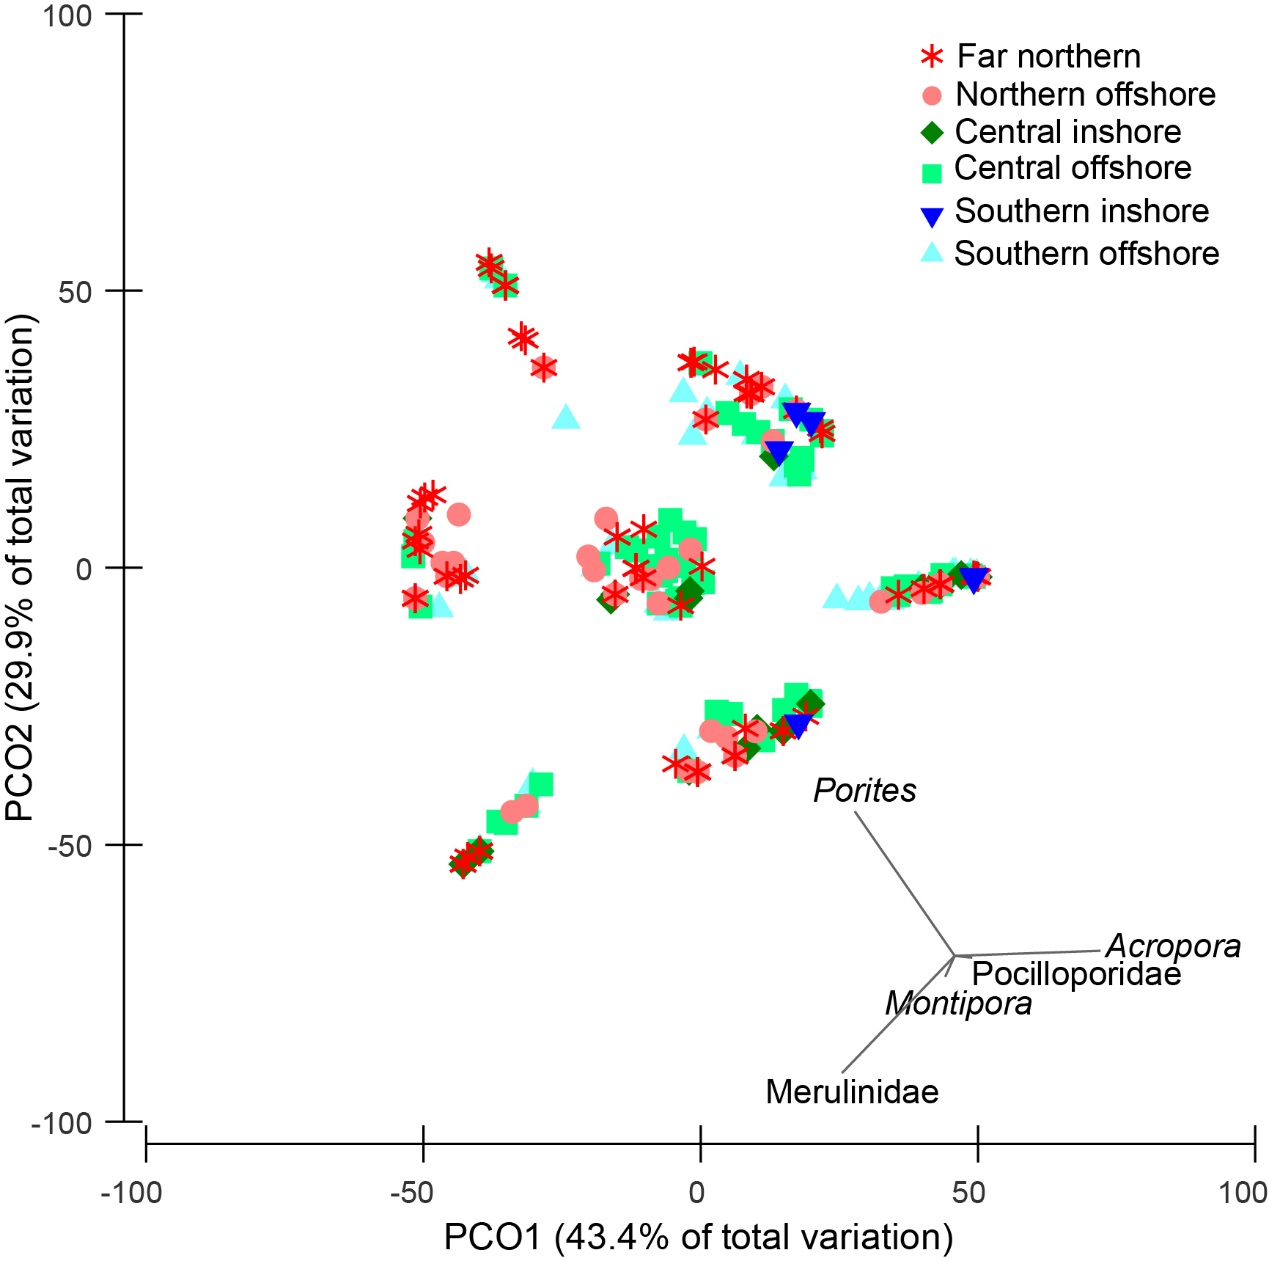


**Figure S2** Juvenile coral (≤40 mm) community composition from within the fixed quadrats.


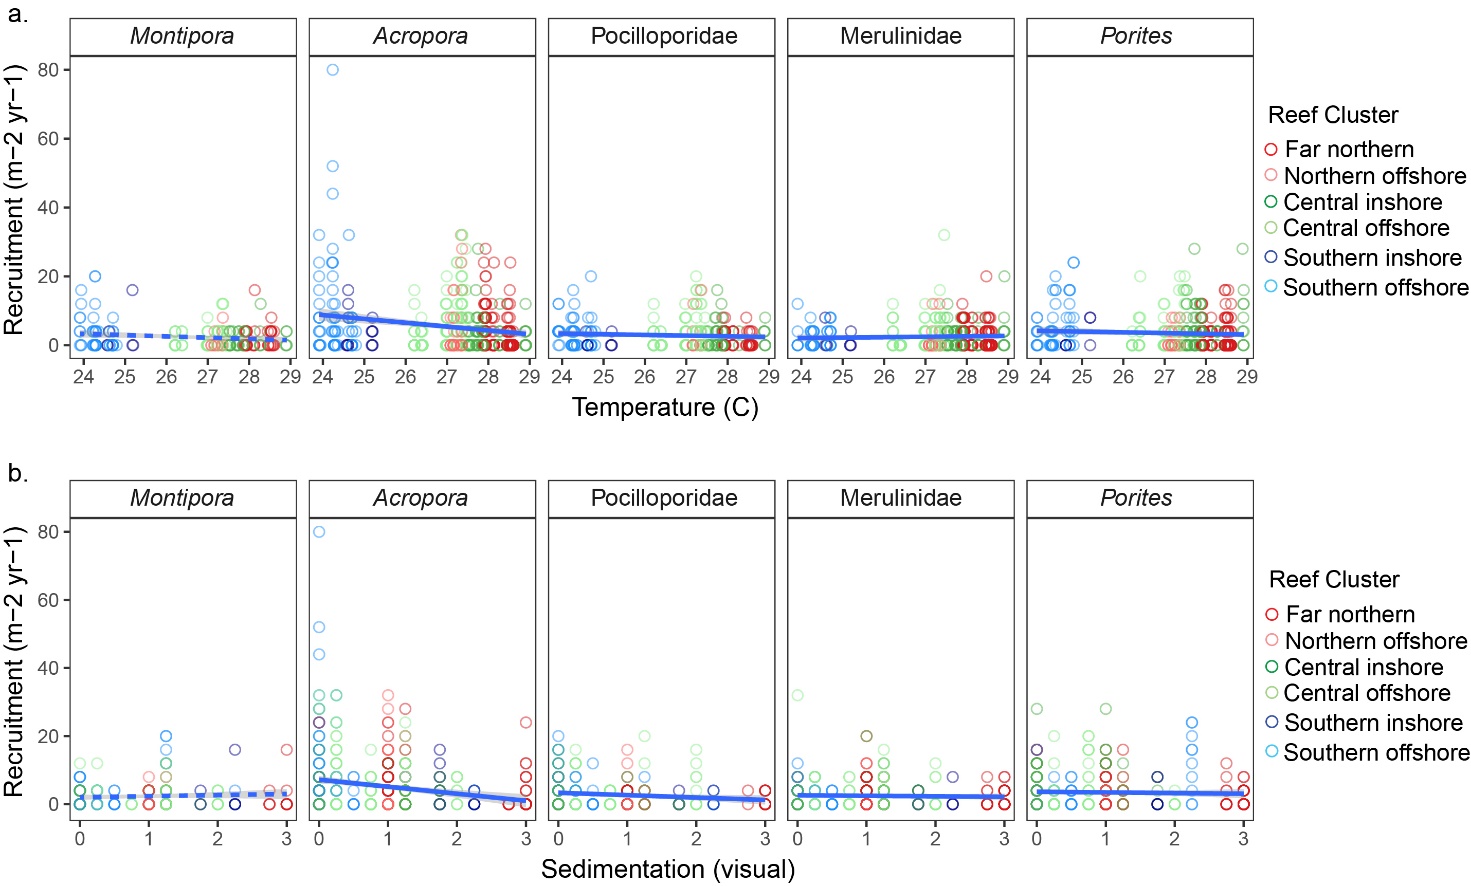


**Figure S3** Annual recruitment rates as a function of (a) temperature and (b) sedimentation for each major taxon across reef clusters.


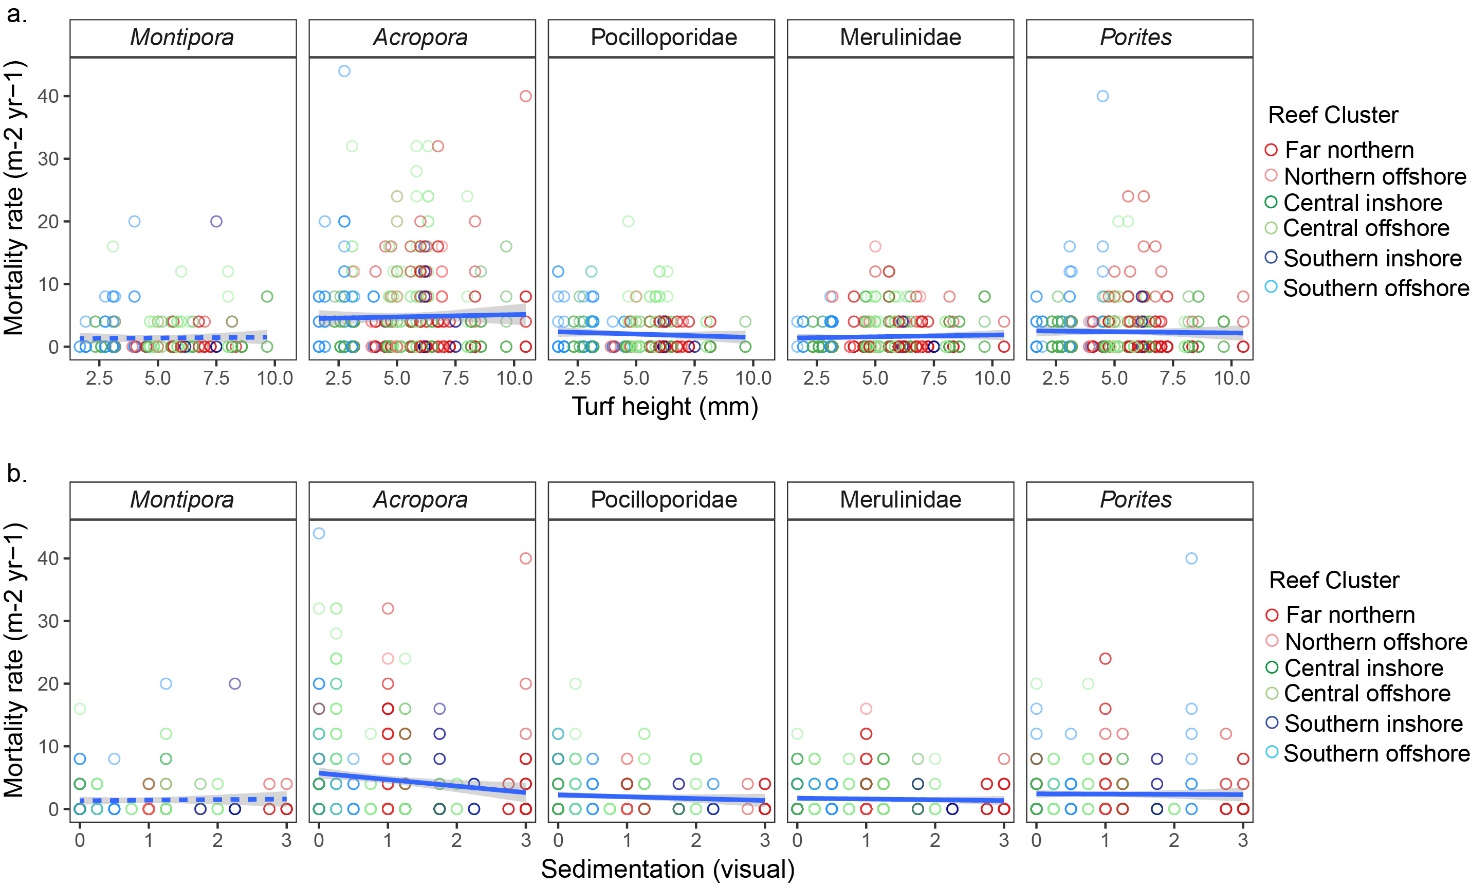


**Figure S4** Annual mortality rates as a function of (a) turf height and (b) sedimentation for each major taxon across reef clusters.


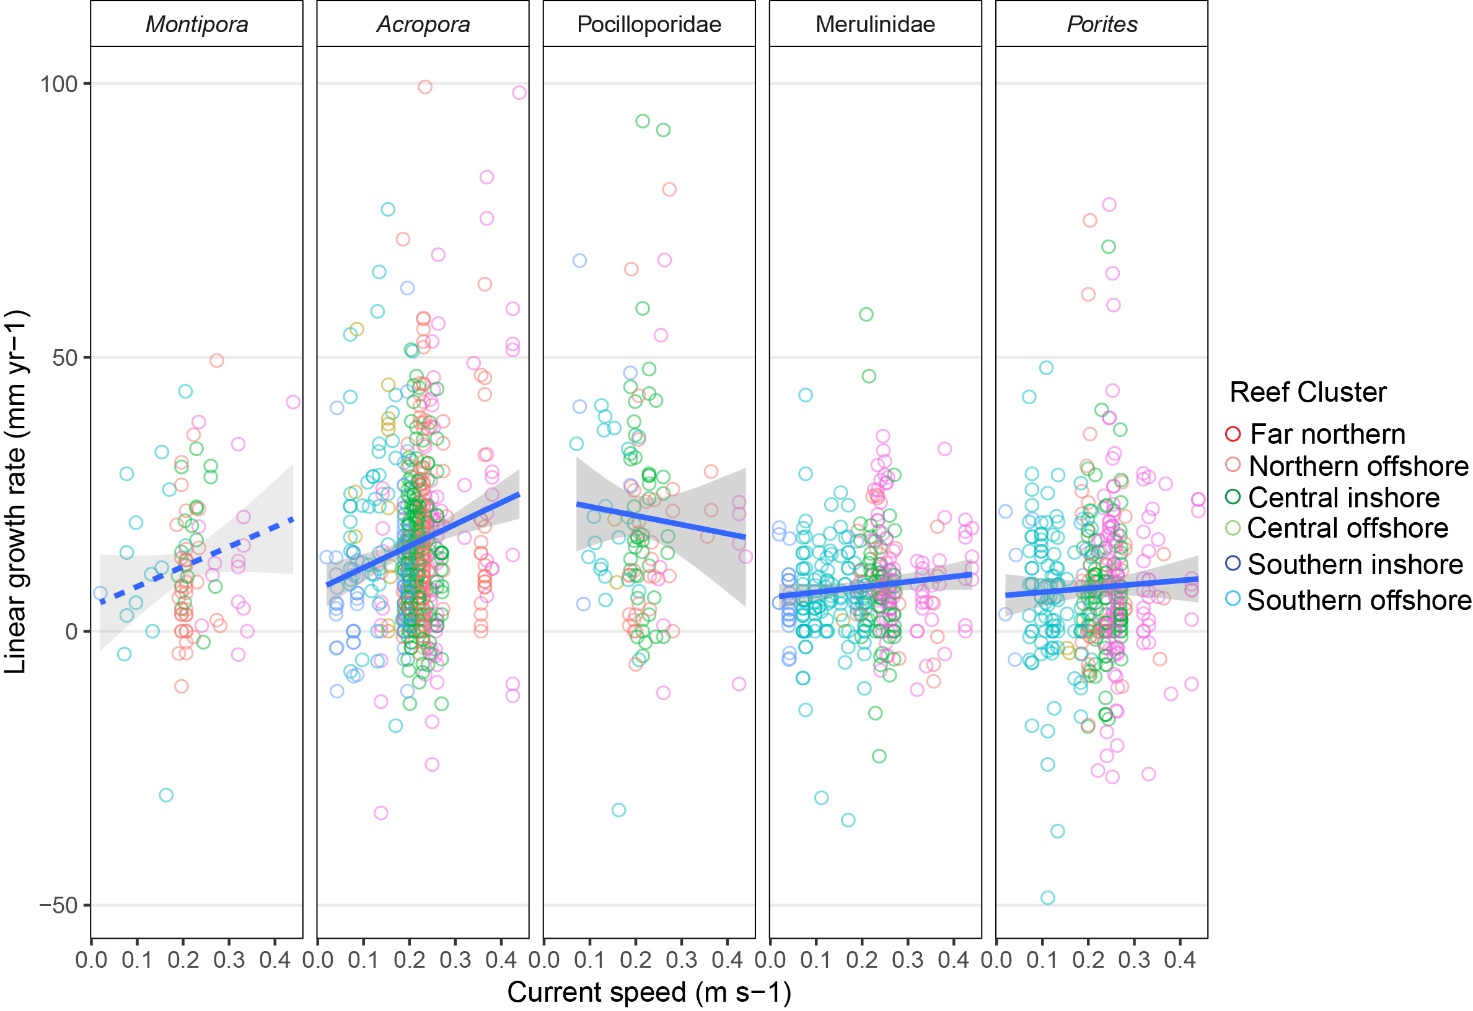


**Figure S5** Annual growth rates (mm yr-1) of juvenile corals as a function of current speed for each major taxon across reef clusters.


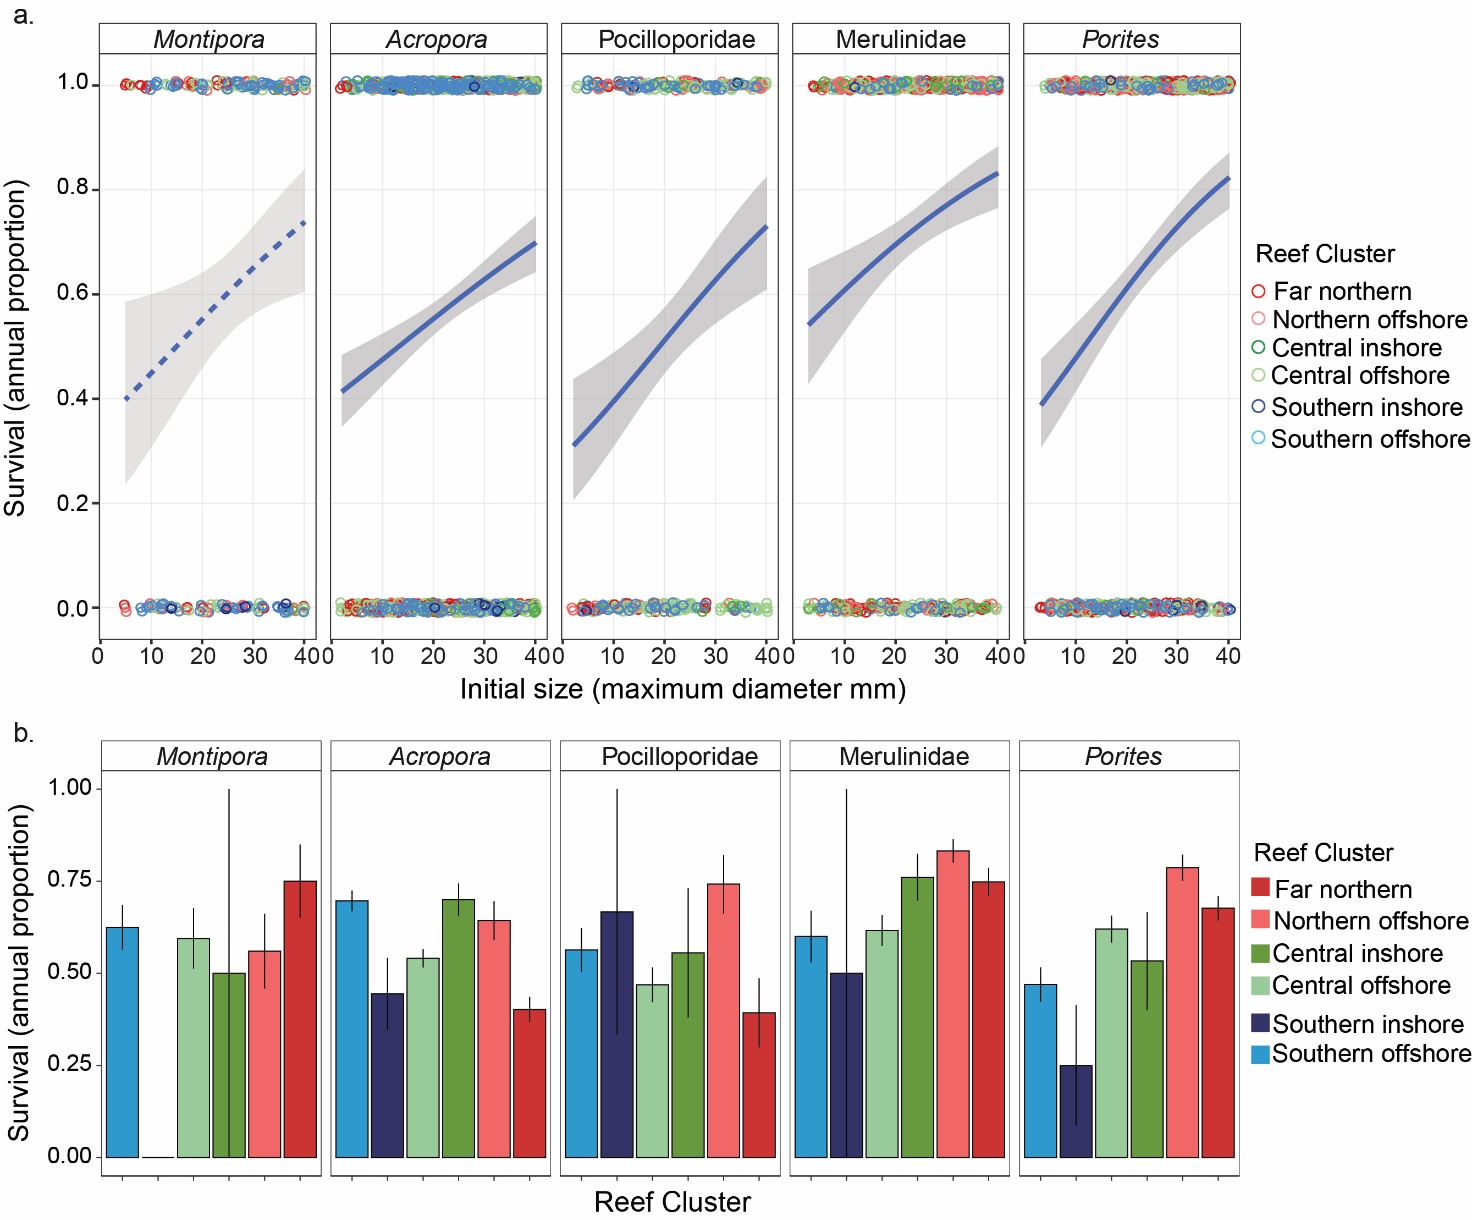


**Figure S6** Juvenile coral survival rates for each major taxon as a function of (a) size and (b) reef cluster.
